# Supplementary material for: Regulator combinations identify systemic sclerosis patients with more severe disease
Source: JCI journal article supplement (doi:10.1172/jci.insight.137567), 2020-07-28

## Supplemental Figures

Supplemental Figure S1. **Activity heatmap of intrinsic subsets related regulators in Milano dataset.** Each row is a SSc sample where red infers fibroproliferative subset, purple infers inflammatory subset, yellow infers limited subset, light green infers normal-like sample and dark green infers healthy control. Each cell is the activity score of one regulator (column) in one sample (row). Blue and red cells mean low and high activities, respectively. Intrinsic subset specific regulator clusters are highlighted with black boxes and names. The name works in pathway enrichment analyses (supplemental table S2).

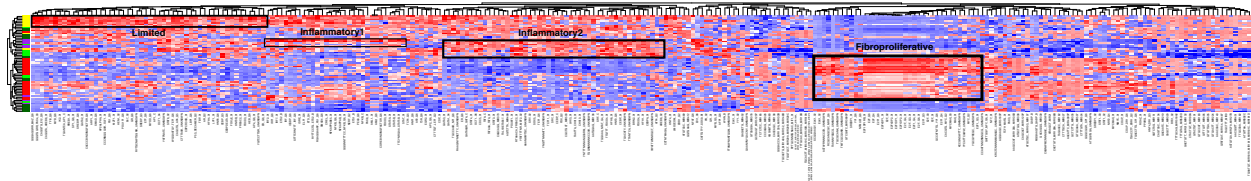

Supplemental Figure S2. **Activity heatmap of intrinsic subsets related regulators in Assassi dataset.** Each row is a SSc sample where red infers fibroproliferative subset, purple infers inflammatory subset, light green infers normal-like sample and dark green infers healthy control. No limited intrinsic subset in Assassi dataset. Each cell is the activity score of one regulator (column) in one sample (row). Blue and red cells mean low and high activities, respectively. Intrinsic subset specific regulator clusters are highlighted with black boxes and names. The name works in pathway enrichment analyses (supplemental table S2).

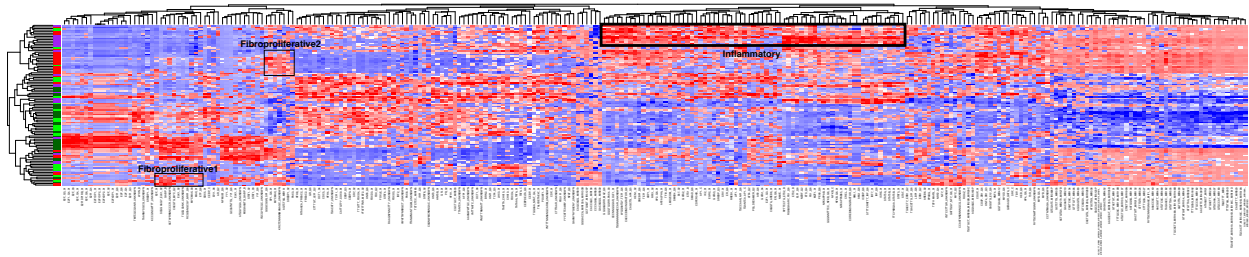

Supplemental Figure S3. **Activity heatmap of intrinsic subsets related regulators in Pendergrass dataset.** Each row is a SSc sample where red infers fibroproliferative subset, purple infers inflammatory subset, light green infers normal-like sample and dark green infers healthy control. No limited intrinsic subset in Pendergrass dataset. Each cell is the activity score of one regulator (column) in one sample (row). Blue and red cells mean low and high activities, respectively. Intrinsic subset specific regulator clusters are highlighted with black boxes and names. The name works in pathway enrichment analyses (supplemental table S2).

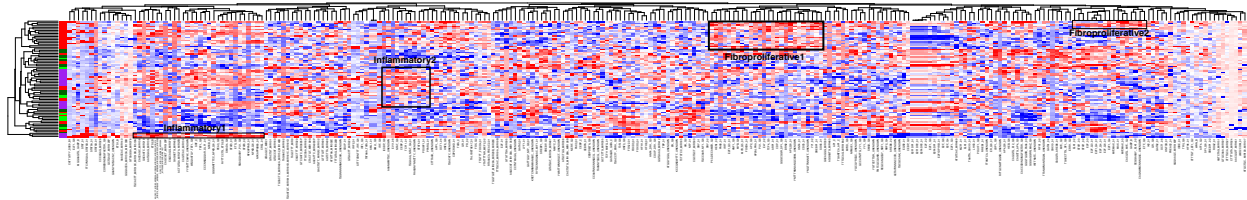

Supplemental Figure S4. **Activity heatmap of intrinsic subsets related regulators in Hinchcliff dataset using baseline samples.** Each row is a SSc sample where red infers fibroproliferative subset, purple infers inflammatory subset, light green infers normal-like sample and dark green infers healthy control. No limited intrinsic subset in Hinchcliff dataset. Each cell is the activity score of one regulator (column) in one sample (row). Blue and red cells mean low and high activities, respectively. Intrinsic subset specific regulator clusters are highlighted with black boxes and names. The name works in pathway enrichment analyses (supplemental table S2).

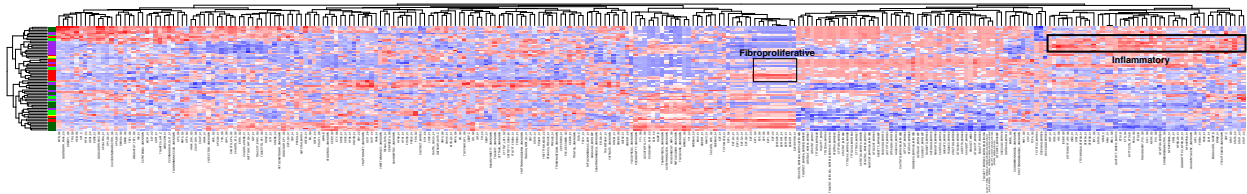

Supplemental Figure S5. **Common pathways enriched in fibroproliferative samples across four datasets.** Pathway details are shown in supplemental table S2. Common pathways are listed.

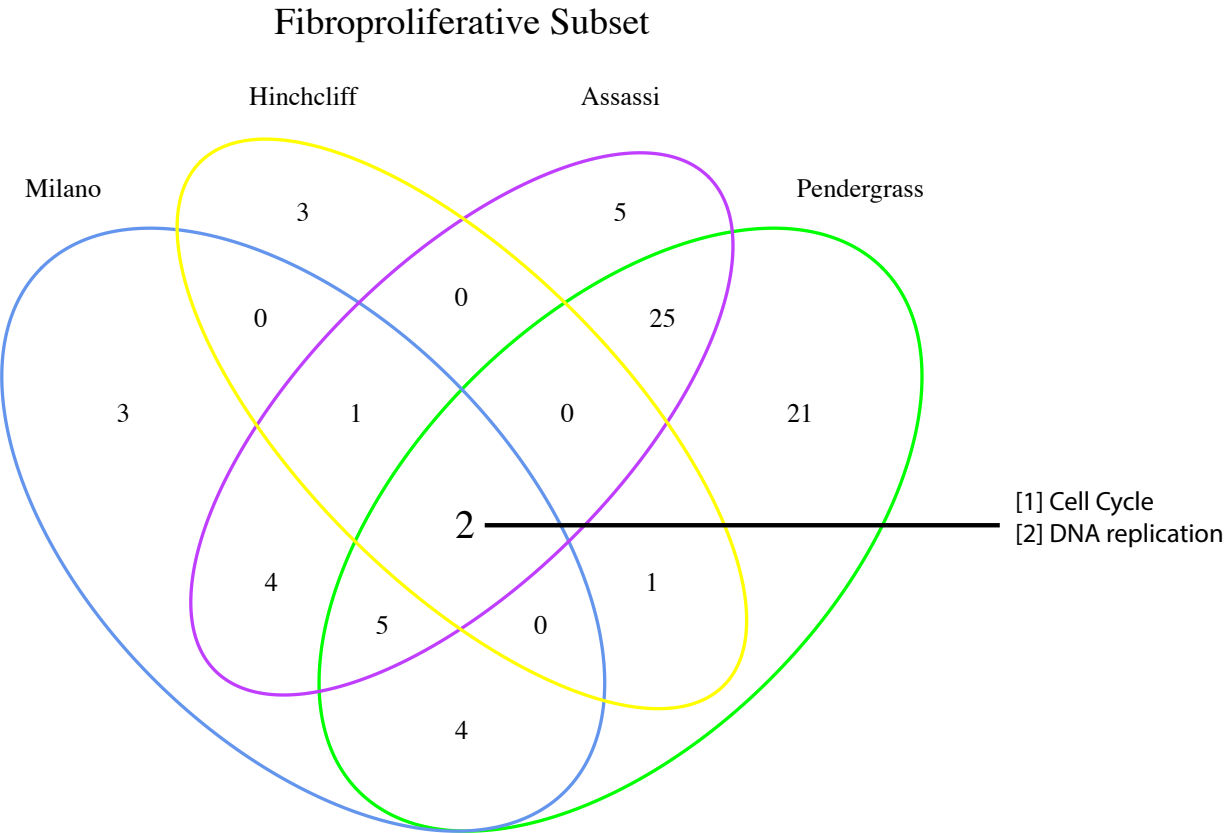

Supplemental Figure S6. **Common pathways enriched in inflammatory samples across four datasets.** Pathway details are shown in supplemental table S2. Common pathways are listed.

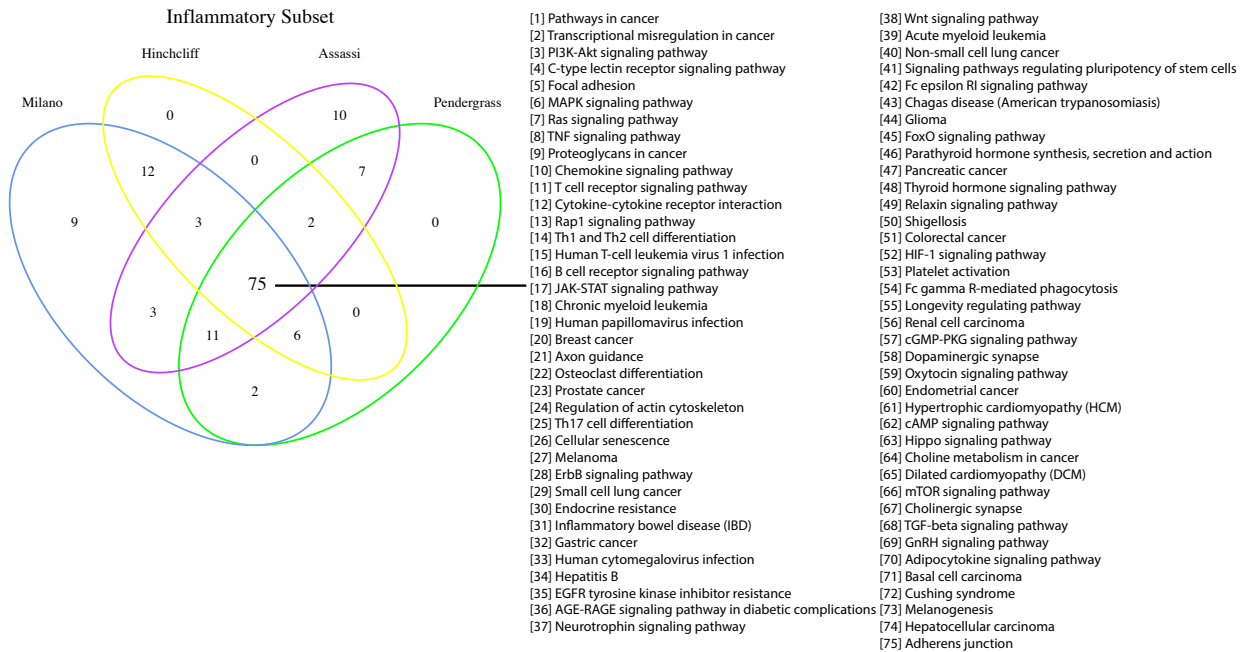

Supplemental Figure S7. **Comparisons of sample fractions in subgroups of fibroproliferative samples in MPH dataset.** The top panel is fraction of dcSSc samples (white) in each group. The bottom panel is the fraction of disease stage in each group (white is early, and grey is late).

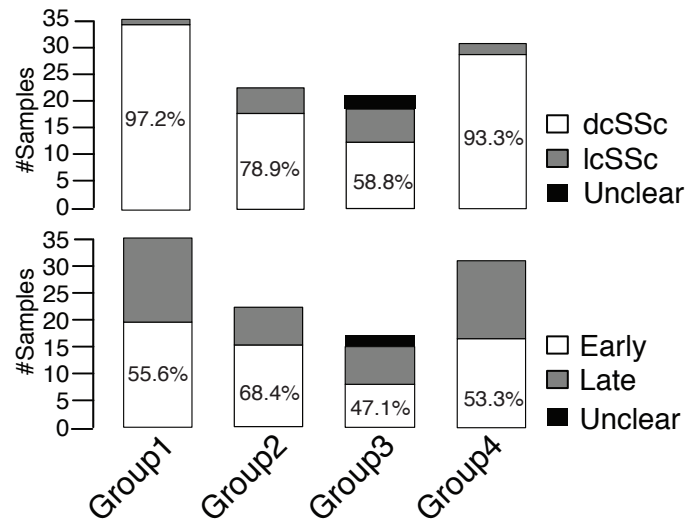

Supplemental Figure S8. **Tracks of samples' pulmonary fibrosis measurements in Hinchcliff dataset.** Different shapes infer four pulmonary fibrosis measurements and different colors suggest different samples with complete data along time points. A) For the only sample classified in group 2 (high FOXO4 activity and low Core binding factor activity). B) For three samples classified in group 4 (low FOXO4 activity and high Core binding factor activity). There is no samples with complete data classified in group 3 (low FOXO4 activity and low Core binding factor activity).

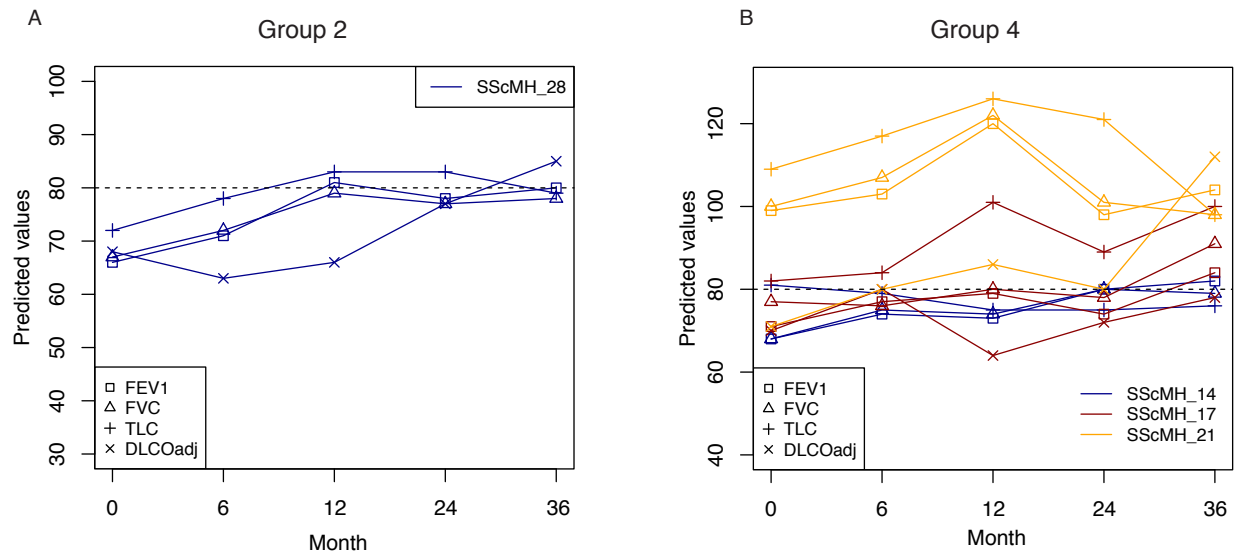



Supplemental Figure S9. **Validation of ILD regulator pair in PBMC dataset.** A) Samples distributions of groups identified with FOXO4 and core binding factor. B) ILD fractions for groups. Fractions are listed below the barplot.

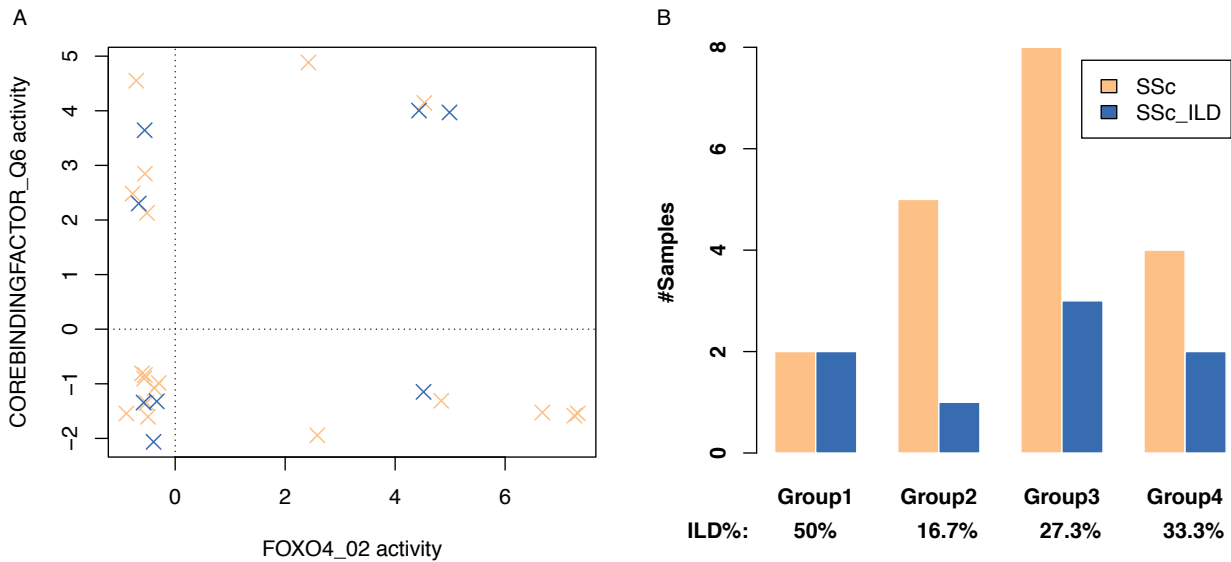

Supplemental Figure S10. **Regulator-target network in inflammatory subset.** Red nodes represent regulators whose activity scores are positively correlated with MRSS and cyan nodes represent regulators whose negative scores are positively correlated with MRSS. The size of the node is positively correlated to its degree of connection. The arrow direction points from regulator to target and a circle means self-regulation. Here, we want to highlight the RUNX1-related core binding factor.

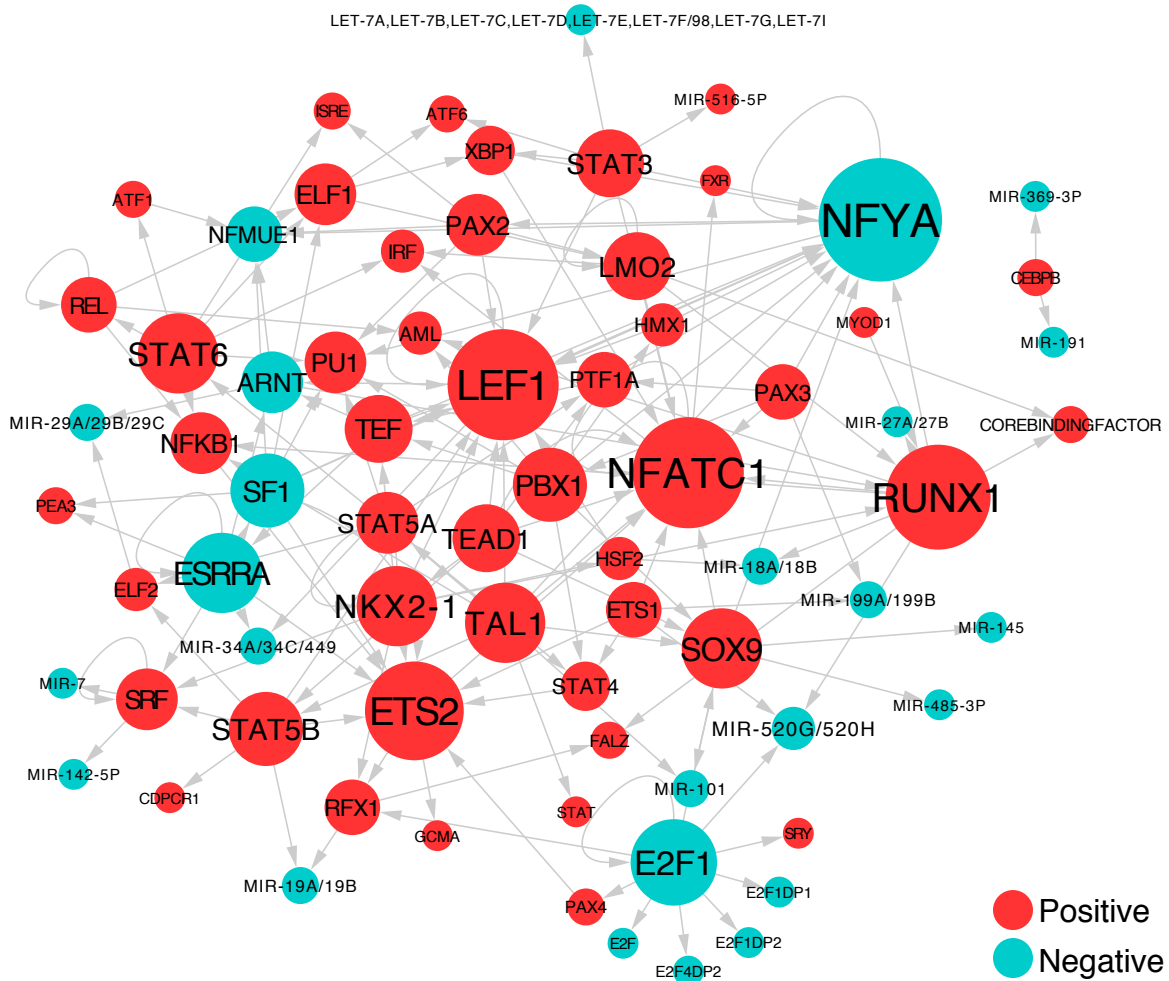

Supplement: sd1 [file 1]
